# Supplementary material
Source: Springer Nature journal article supplement (https://www.springermedizin.de/resource/supplementary/12887_2012_720_MOESM6_ESM.pdf/9475574)
Supplement: MOESM6 [file 9475574]

| Facility                  | F1            | F2            | F3            | F4            | F5            | F6            | F7            | F8            | F9            | F10           | F11           | F12           | F13           | F14           | HW   |
|---------------------------|---------------|---------------|---------------|---------------|---------------|---------------|---------------|---------------|---------------|---------------|---------------|---------------|---------------|---------------|------|
| Oxygen                    | Available     | Available     | Available     | Not Available | Available     | Available     | Not Available | Available     | Available     | Available     | Available     | Not Available | Not Available | Available     | Most |
| Normal saline             | Available     | Alw  |
| Hartman/RI solution       | Available     | Not Available | Available     | Available     | Available     | Available     | Alw  |
| 5% Dextrose               | Not Available | Available     | Not Available | Available     | Available     | Available     | Available     | Available     | Available     | Not Available | Available     | Available     | Available     | Available     | Alw  |
| 10% Dextrose              | Not Available | Not Available | Not Available | Available     | Available     | Not Available | Available     | Available     | Not Available | Not Available | Available     | Not Available | Not Available | Available     | Occa |
| 50% Dextrose              | Not Available | Available     | Not Available | Available     | Available     | Available     | Available     | Available     | Available     | Not Available | Available     | Not Available | Not Available | Available     | Com  |
| ORS                       | Available     | Not Available | Com  |
| Diazepam                  | Available     | Most |
| Injection Phenobarbitone  | Available     | Available     | Available     | Available     | Available     | Available     | Not Available | Available     | Available     | Available     | Available     | Available     | Not Available | Available     | Most |
| Injection Adrenaline      | Not Available | Not Available | Available     | Available     | Available     | Not Available | Available     | Available     | Not Available | Available     | Available     | Available     | Available     | Available     | Most |
| Injection Vitamin K       | Not Available | Available     | Available     | Available     | Available     | Not Available | Available     | Available     | Available     | Not Available | Available     | Not Available | Not Available | Available     | Com  |
| Ceftriaxone               | Not Available | Available     | Available     | Available     | Available     | Available     | Available     | Available     | Available     | Available     | Available     | Not Available | Available     | Available     | Most |
| Flucloxacillin            | Not Available | Available     | Available     | Available     | Available     | Available     | Available     | Available     | Available     | Available     | Available     | Available     | Available     | Available     | Occa |
| Amoxicillin               | Available     | Available     | Available     | Not Available | Not Available | Available     | Available     | Available     | Available     | Available     | Available     | Available     | Available     | Available     | Most |
| Ampicillin                | Not Available | Available     | Available     | Not Available | Available     | Available     | Available     | Available     | Not Available | Available     | Available     | Available     | Not Available | Available     | Most |
| Gentamycin                | Not Available | Available     | Available     | Available     | Available     | Available     | Available     | Available     | Available     | Available     | Available     | Available     | Available     | Available     | Most |
| IV Chloramphenicol        | Not Available | Not Available | Available     | Available     | Not Available | Available     | Available     | Available     | Available     | Available     | Available     | Available     | Not Available | Available     | Most |
| Oral Fluconazole          | Available     | Not Available | Available     | Not Available | Available     | Not Available | Not Available | Available     | Not Available | Available     | Available     | Not Available | Not Available | Not Available | Com  |
| Benzyl Penicilli          | Available     | Most |
| Tetracycline eye ointment | Available     | Available     | Not Available | Available     | Available     | Available     | Available     | Available     | Not Available | Not Available | Not Available | Available     | Available     | Available     | Com  |
| Aminophylln               | Available     | Most |
| Prednisolone              | Available     | Available     | Available     | Not Available | Available     | Available     | Available     | Not Available | Available     | Available     | Available     | Available     | Available     | Available     | Most |
| Salbutamol                | Available     | Not Available | Available     | Available     | Available     | Available     | Available     | Available     | Available     | Available     | Available     | Not Available | Available     | Available     | Most |
| Paracetamol syrup         | Not Available | Available     | Not Available | Not Available | Available     | Not Available | Not Available | Not Available | Available     | Not Available | Available     | Available     | Available     | Available     | Occa |
| Metronidazole             | Not Available | Available     | Available     | Available     | Available     | Available     | Available     | Available     | Available     | Available     | Available     | Available     | Available     | Available     | Most |
| Erythromycin              | Available     | Available     | Available     | Not Available | Available     | Available     | Available     | Available     | Available     | Available     | Available     | Available     | Available     | Available     | Most |

Key for the availability of essential drugs and infusions at the time of visit:  Available at the time of visit  Not available at the time of visit.

Key for the health workers opinions HW: Never available (Nev) = 0 months, Occasionally available (Occa) = 1 - 3 Months, Commonly available (Com) = 4 - 6 months Most available (Most) = 7 - 9 months, Always (Alw) = 10 -12 months
